# Supplementary material for: Photochemical generation and reactivity of a new phthalocyanine-manganese–oxo intermediate
Source: Royal Society of Chemistry journal article supplement (doi:10.1039/d3cc01275a), 2023-01-01
Supplement: d3cc01275a1.pdf [file d3cc01275a1.pdf]

## Supplementary Information

### Photochemical generation and reactivity of a new phthalocyanine- manganese-oxo intermediate

Tristan Skipworth,<sup>a</sup> Seth Klaine,<sup>a</sup> and Rui Zhang<sup>a</sup>

<sup>a</sup> Department of Chemistry, Western Kentucky University, 1906 College Heights  
Blvd., Bowling Green, Kentucky, USA. Fax: 1-270-7455631; Tel: +1-270-7453803;  
E-mail: [rui.zhang@wku.edu](mailto:rui.zhang@wku.edu)

#### Contents

|                       |           |
|-----------------------|-----------|
| Experimental.....     | Pages 2-3 |
| GC traces.....        | Pages 4-6 |
| Figure S1 and S2..... | Page 7    |
| Figure S3 .....       | Page 8    |

## **Experimental:**

### **Chemicals and Instrumentation**

All commercial reagents were of the best available purity and were used as supplied unless otherwise specified. Acetonitrile was obtained from Sigma Aldrich (HPLC grade) and passed through a dry alumina column prior to use. All organic substrates for kinetic studies were also purified by passing through a flash chromatography column of active alumina (Grade I) before use. H<sub>2</sub><sup>18</sup>O (97% <sup>18</sup>O-enriched) and Mn<sup>III</sup>(<sup>t</sup>Bu<sub>4</sub>-Pc)Cl (**1**) were directly obtained from Sigma-Aldrich and used as such. UV-vis spectra were performed on an Agilent 8454 diode array spectrometer using standard 1.0-cm quartz cuvettes. Gas chromatography-mass spectrometry (GC-MS) analysis was performed on an Agilent GC7820A/MS5977B, coupled with an auto sample injector using Agilent HB-5 capillary columns. Electrospray ionization-mass spectroscopy (ESI-MS) data were collected using an Agilent 500 LC-MS Ion Trap System. Visible light was produced from a SOLA SE II light engine (Lumencor) configured with a liquid light guide (60-120 W).

### **Photochemical generation of manganese-oxo species **3****

Treatment of compound **1** (typically  $2 \times 10^{-5}$  M) with a 2-fold excess of Ag(ClO<sub>3</sub>) or Ag(NO<sub>2</sub>) in anaerobic CH<sub>3</sub>CN quickly formed the corresponding complexes **2**, as evidenced by UV-vis spectroscopy. When the solution of **2** was irradiated with visible light from a Solar engine (60 or 120 W) at ambient temperature, the formation of **3** was complete in *ca.* 1-2 min, which was monitored by UV-visible. The photochemical reactions became very slow or inert at higher concentrations of the precursor ( $>10^{-4}$  M), apparently due to light blocking.

### **Kinetic studies**

Reactions of oxo-species **3** with an excess of organic substrates (>10,00 equiv.) were conducted in an acetonitrile solution at  $23 \pm 2$  °C. The rates of the oxo group transfer reactions from **3** to substrates were monitored by the decay of the Q-band absorption band of the oxo-species **3**. The kinetic traces at  $\lambda_{\text{max}} = 620$  nm displayed good pseudo-first-order behavior for at least four half-lives, and the data gave pseudo-first-order observed rate constants,  $k_{\text{obs}}$ . Plots of these values against the concentration of substrate (final concentration) were linear and the slope gave the second-order rate constant, which is an average of 2-3 determinations consisting of **3** independent kinetic measurements. The standard deviations in Table 1 are  $2\sigma$ .

#### **General procedure for preparative reactions**

Reactions for product analysis were carried out in CH<sub>3</sub>CN at a higher amount of **3** (*ca.* 10  $\mu\text{mol}$ ) and a large excess of organic substrates (same molar ratio range as kinetic studies) in 20 mL vial and monitored by UV-vis spectroscopy for completion of the reaction.

Oxidized products were well known and identified by GC-MS with Mass Spectral libraries for the MSD ChemStation (Agilent). Yields were calculated based on precursor **2a** used for generation of **3** (> 95%) by GC analysis of the spent reaction solutions with internal standard (1,2,4-trichlorobenzene or iodobenzene). The corresponding GC traces for oxidized products in Table 1 are listed below:

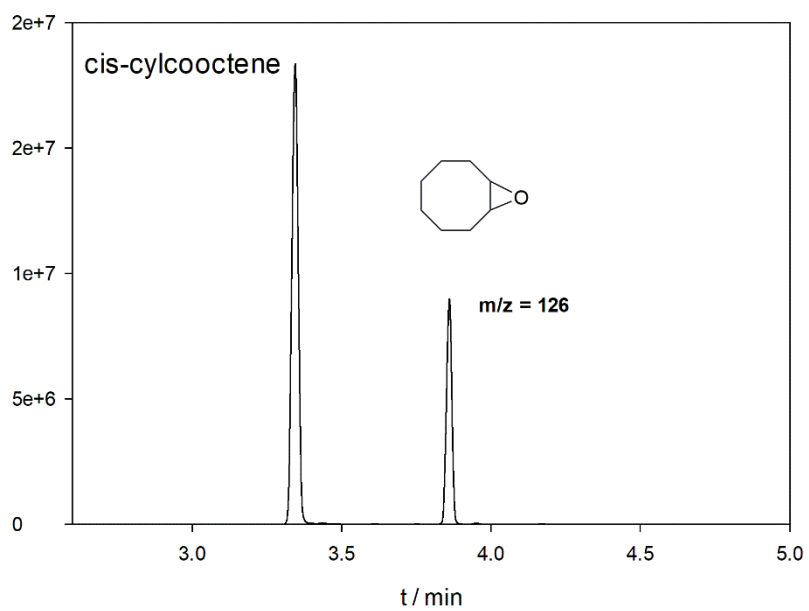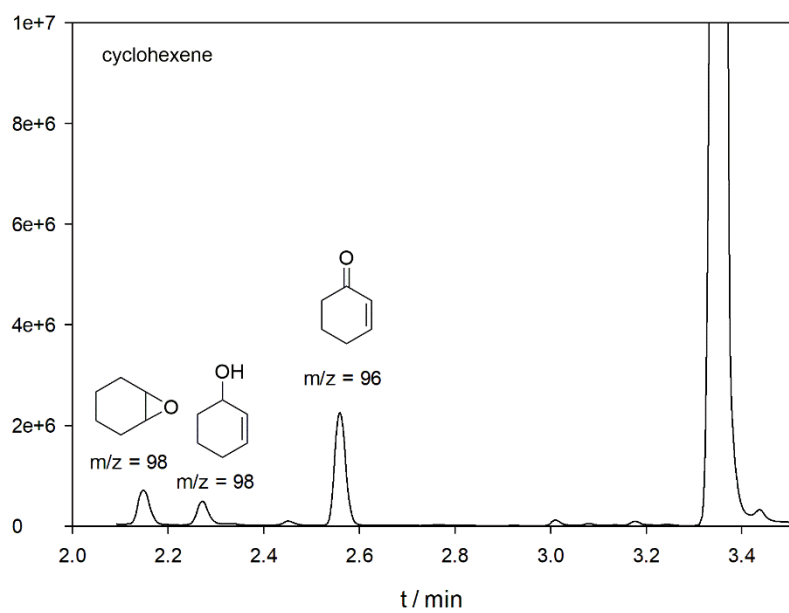

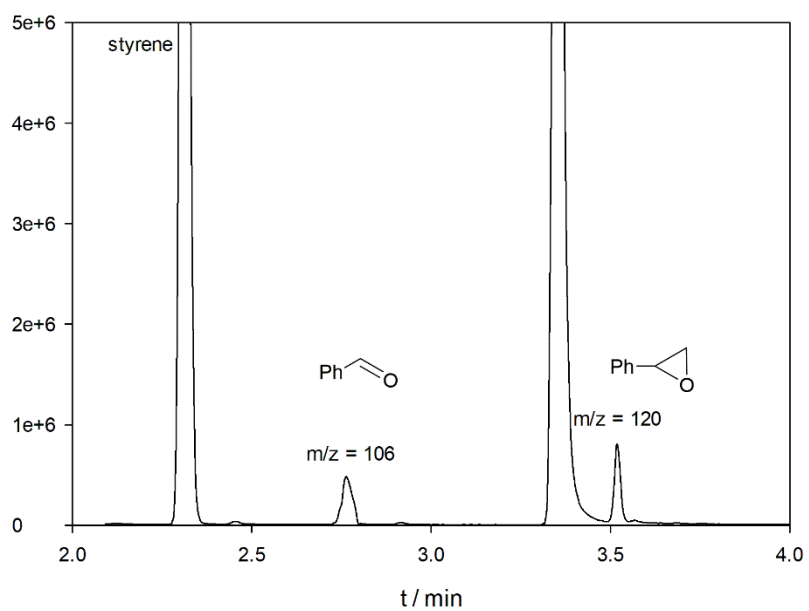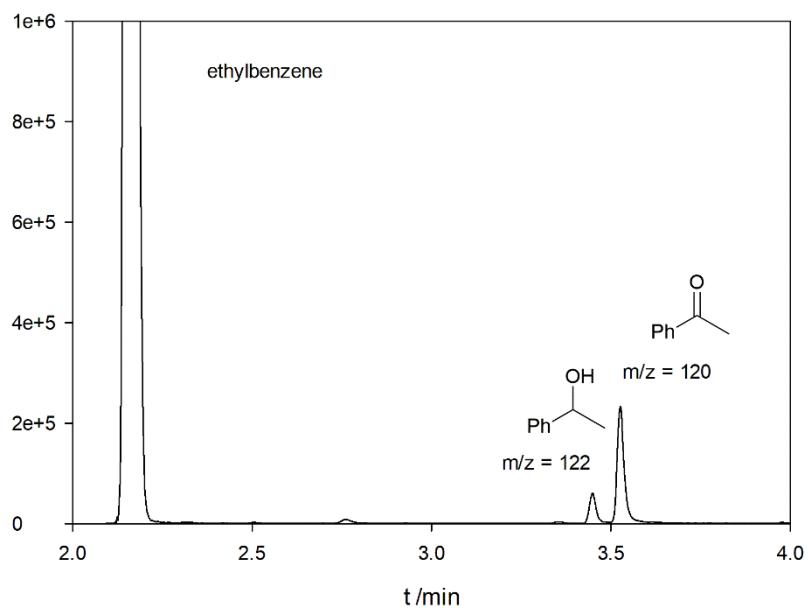

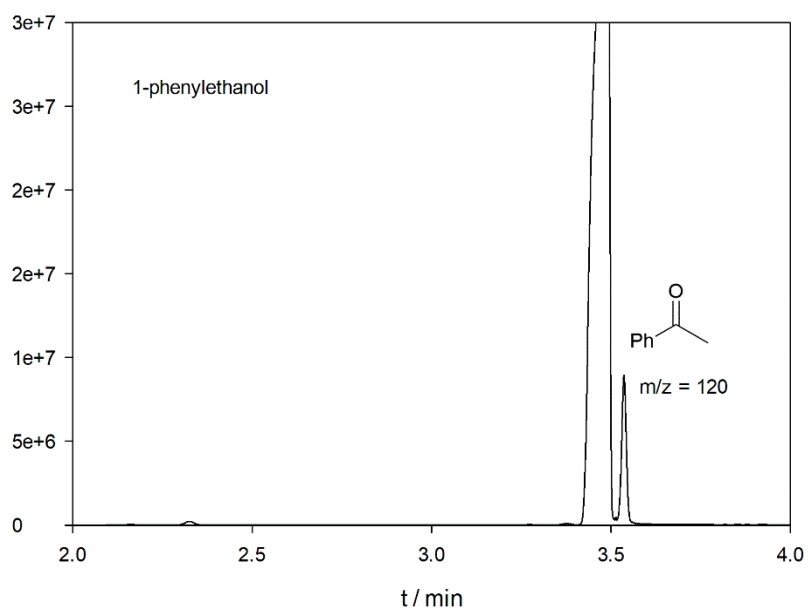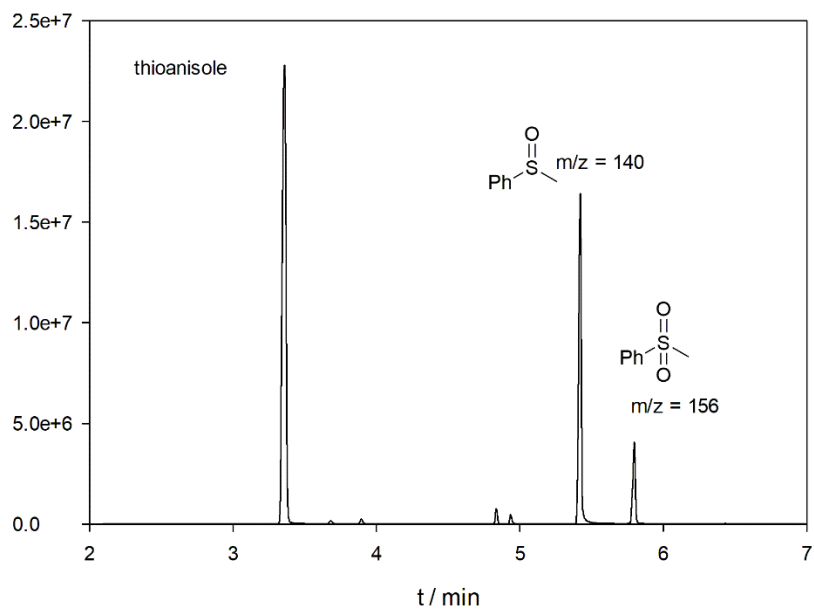

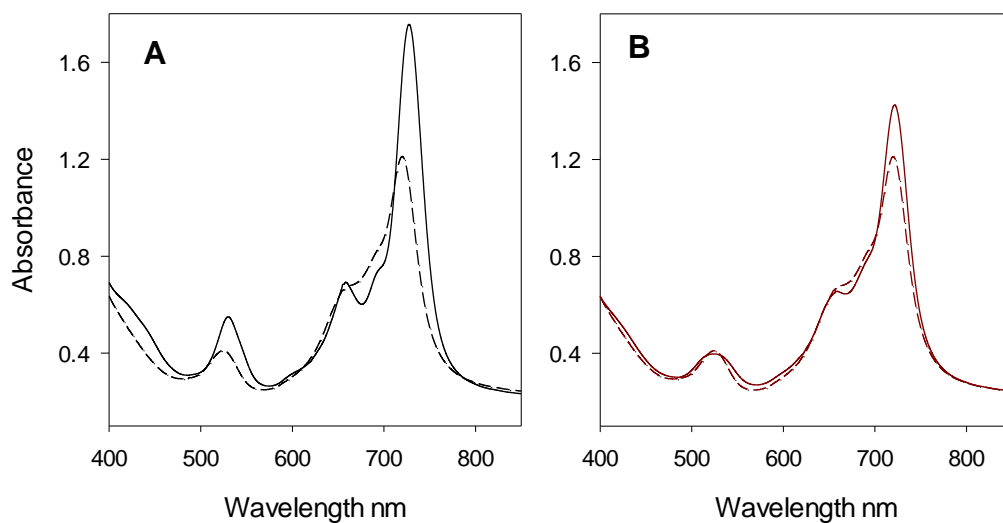

**Fig. S1.** UV-vis spectra of  $[\text{Mn}^{\text{III}}(\text{tBu}_4\text{Pc})]\text{Cl}$  (**1**) ( $2 \times 10^{-5}$  M, dashed line) and (A)  $[\text{Mn}^{\text{III}}(\text{tBu}_4\text{Pc})](\text{ClO}_3)$  (**2a**, solid), and (B)  $[\text{Mn}^{\text{III}}(\text{tBu}_4\text{Pc})](\text{NO}_2)$  (**2b**, solid) in  $\text{CH}_3\text{CN}$  solution at room temperature.

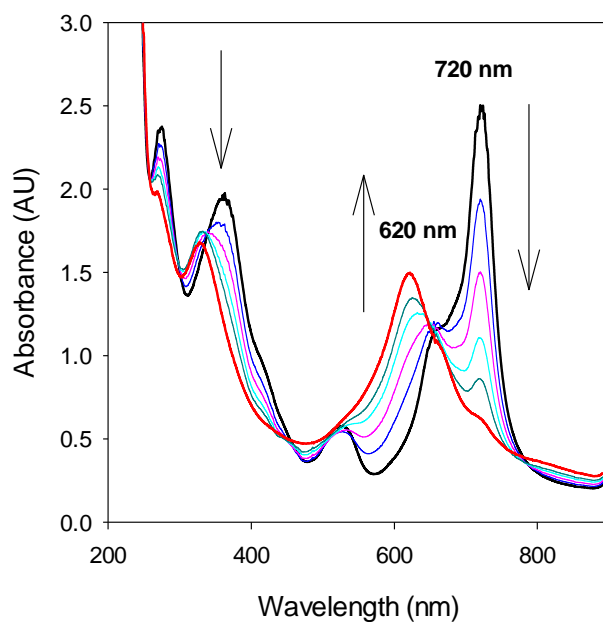

**Fig. S2.** Time-resolved spectra for generating  $[\text{Mn}^{\text{IV}}(\text{tBu}_4\text{Pc})(\text{O})]$  (**3**) by photolysis of **2b** ( $2.0 \times 10^{-5}$  M) over 100 s with visible light (120 W) in  $\text{CH}_3\text{CN}$  at  $22^\circ\text{C}$ .

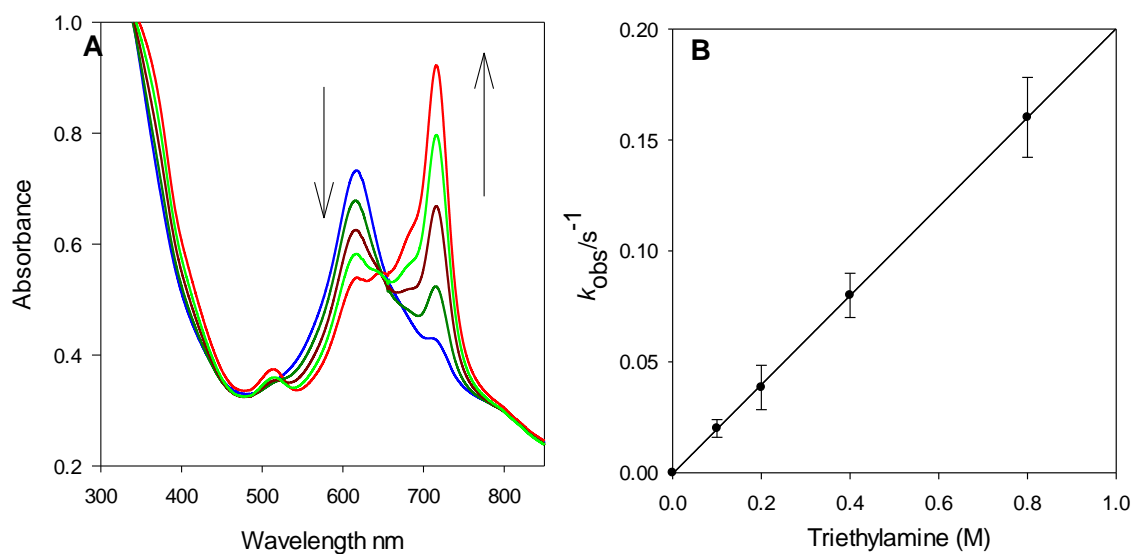

**Fig. S3.** (A) Time-resolved spectra of the one-electron reduction of  $[\text{Mn}^{\text{IV}}(\text{'Bu}_4\text{Pc})(\text{O})]$  (**3**) with triethylamine (0.1 M) in  $\text{CH}_3\text{CN}$  over 150 s. (B) Kinetic plot of observed rate constant versus the concentrations of trimethylamine with  $k_{\text{ox}} = (0.21 \pm 0.02) \text{ M}^{-1}\text{s}^{-1}$ .
